# Supplementary material for: Examination of the effects of Campylobacter concisus zonula occludens toxin on intestinal epithelial cells and macrophages
Source: Springer Nature journal article supplement (doi:10.1186/s13099-016-0101-9), 2016-05-04

**A**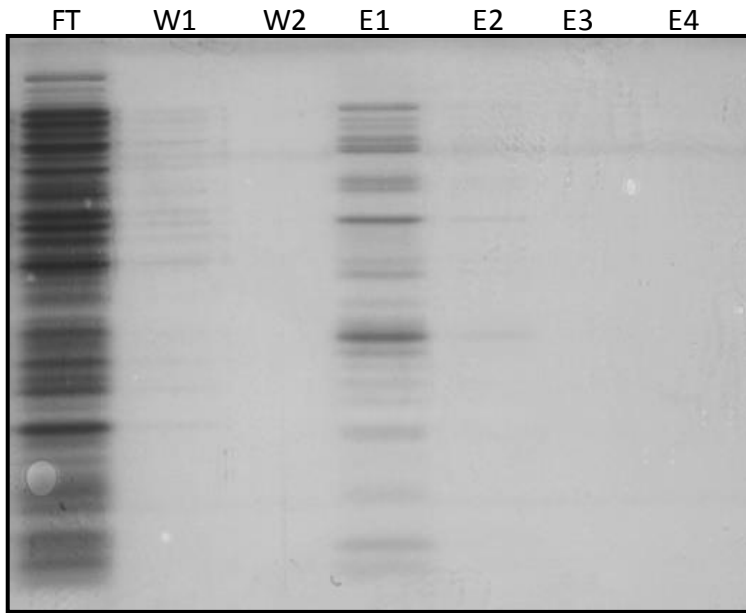**B**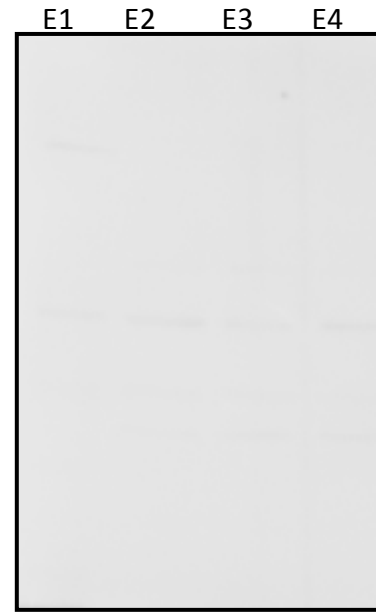**C**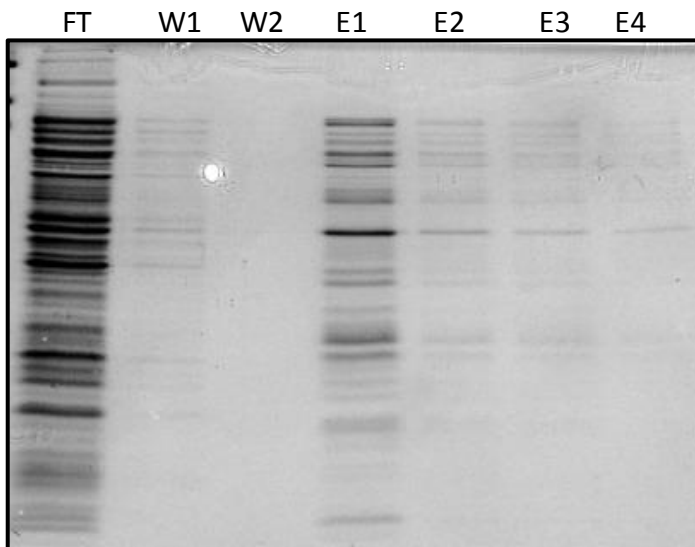**D**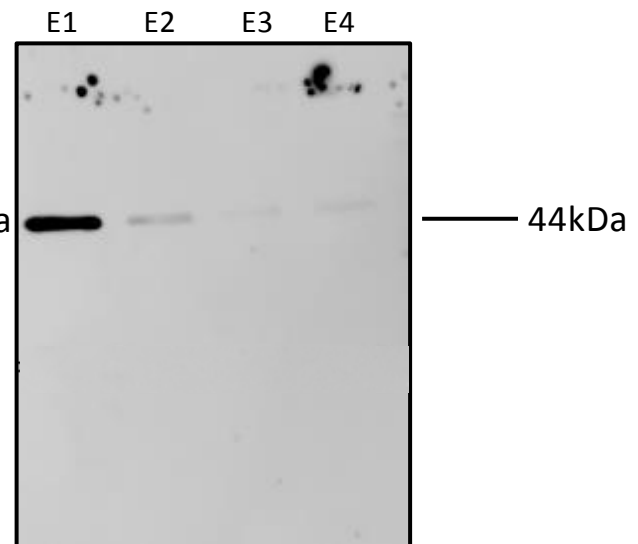

Supplement: MOESM1 [file 10160310]
